# Supplementary material for: Modeling autosomal recessive cutis laxa type 1C in mice reveals distinct functions for Ltbp-4 isoforms
Source: PubMed Central journal article supplement (PMC4381339; doi:10.1242/dmm.018960), 2015-02-20
Supplement: supp_8.4.403_DMM018960.pdf [file supp_8.4.403_DMM018960.pdf]

# 1 **Modeling Autosomal Recessive Cutis Laxa Type 1C (ARCL1C) in**

## 2 **Mice Reveals Distinct Functions of Ltbp-4 Isoforms**

3 Running title: Ltbp-4L and Ltbp-4S in ARCL1C

4 Insa Bultmann-Mellin<sup>1¶</sup>, Anne Conradi<sup>1¶</sup>, Alexandra C. Maul<sup>1</sup>, Katharina Dinger<sup>1,2</sup>,  
5 Frank Wempe<sup>3</sup>, Alexander P. Wohl<sup>4</sup>, Thomas Imhof<sup>4,5</sup>, F. Thomas Wunderlich<sup>6,7,8</sup>,  
6 Alexander C. Bunck<sup>9</sup>, Tomoyuki Nakamura<sup>10</sup>, Katri Koli<sup>11</sup>, Wilhelm Bloch<sup>12</sup>,  
7 Alexander Ghanem<sup>13</sup>, Andrea Heinz<sup>14</sup>, Harald von Melchner<sup>3</sup>, Gerhard Sengle<sup>4,6</sup>, and  
8 Anja Sterner-Kock<sup>1\*</sup>

9 <sup>1</sup>Center for Experimental Medicine, Medical Faculty, University of Cologne, Cologne, Germany

10 <sup>2</sup>Department of Pediatrics and Adolescent Medicine, Medical Faculty, University of Cologne, Cologne,  
11 Germany

12 <sup>3</sup>Department of Molecular Hematology, University of Frankfurt Medical School, Frankfurt am Main, Germany

13 <sup>4</sup>Center for Biochemistry, Medical Faculty, University of Cologne, Cologne, Germany

14 <sup>5</sup>Institute for Dental Research and Oral Musculoskeletal Biology, Medical Faculty, University of Cologne,  
15 Cologne, Germany

16 <sup>6</sup>Center for Molecular Medicine Cologne (CMMC), University of Cologne, Cologne, Germany

17 <sup>7</sup>Max Planck Institute for Metabolism Research, Cologne, Germany

18 <sup>8</sup>Cologne Excellence Cluster on Cellular Stress Responses in Aging-Associated Diseases (CECAD), University  
19 of Cologne, Cologne, Germany

20 <sup>9</sup>Department of Radiology, Medical Faculty, University of Cologne, Cologne, Germany

21 <sup>10</sup>Department of Pharmacology, Kansai Medical University, Osaka, Japan

22 <sup>11</sup>Research Programs Unit and Transplantation Laboratory, Haartman Institute, University of Helsinki, Helsinki,  
23 Finland

24 <sup>12</sup>Institute of Cardiology and Sports Medicine, German Sport University Cologne, Cologne, Germany

25 <sup>13</sup>Department of Medicine/Cardiology, University of Bonn, Bonn, Germany

26 <sup>14</sup>Institute of Pharmacy, Martin Luther University Halle-Wittenberg, Halle (Saale), Germany

27

28 \*Corresponding author

29 E-mail: anja.sterner-kock@uk-koeln.de (ASK)

30

31 ¶These authors contributed equally to this work

32 Keywords: Latent Transforming Growth Factor Beta Binding Protein 4, Ltbp-4, Ltbp-4L,  
33 Ltbp-4S, Autosomal Recessive Cutis Laxa Type 1C, ARCL1C, Elastogenesis, Extracellular  
34 Matrix, ECM, Fibulin-4, Fibulin-5

35

36 **Supplementary material**

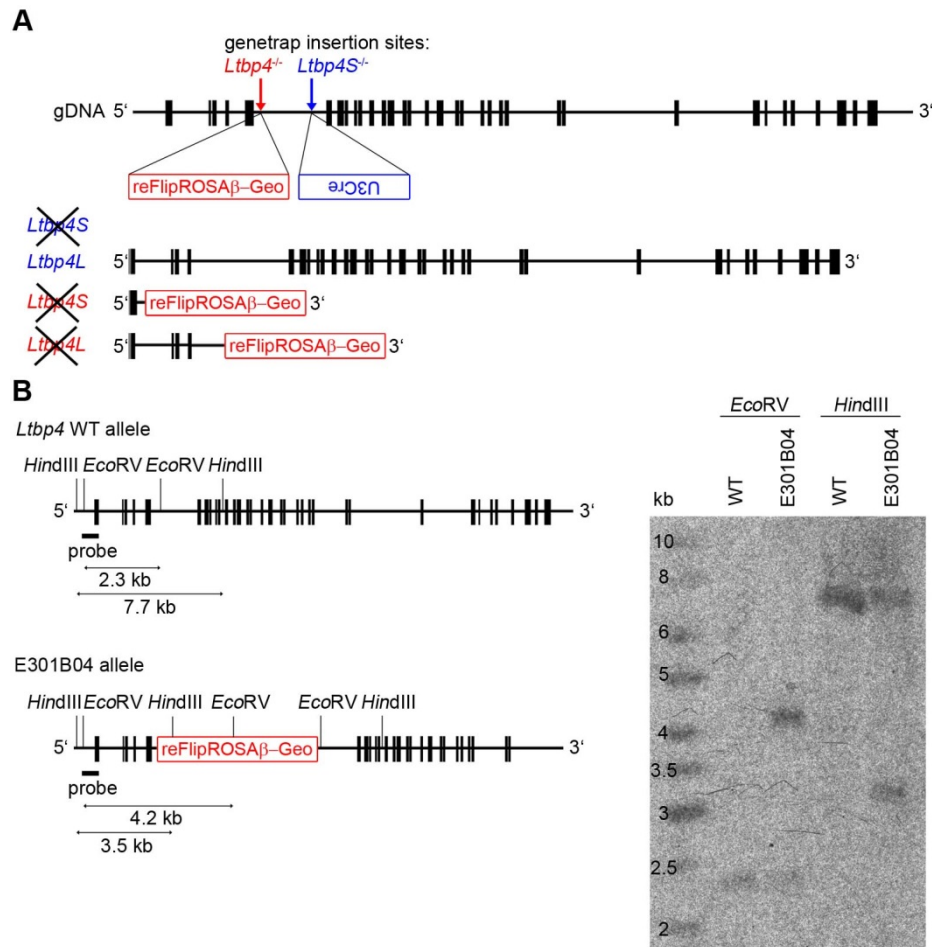

37

38

39 **Supplementary material Fig. S1. Generation of *Ltbp4<sup>S-/-</sup>* and *Ltbp4<sup>L-/-</sup>* mice.**

40 (A) To generate mice lacking *Ltbp-4* we obtained an ES-cell clone (E301B04) from GGTC (German Gene Trap  
 41 Consortium, Germany), containing a FlipROSAβgeo gene-trap cassette in the first intron of the short isoform of  
 42 *Ltbp4* (*Ltbp4<sup>S</sup>*; e.g. in the fourth intron of *Ltbp4<sup>L</sup>*). The used vector consisted of a promoterless βgeo-reporter  
 43 with an upstream splice acceptor site (SA) and a downstream polyadenylation sequence (pA) that terminated  
 44 expression of both *Ltbp4* transcripts. The integration of the U3Cre vector was described previously (Sterner-  
 45 Kock et al., 2002) (gDNA= genomic DNA). (B) Representative Southern Blot analysis of gDNA from wild-type  
 46 (WT) and ES-cell clone E301B04 showing mutant and WT bands using *EcoRV*- or *HindIII*-digested gDNA and  
 47 specific 5'-probes.

48

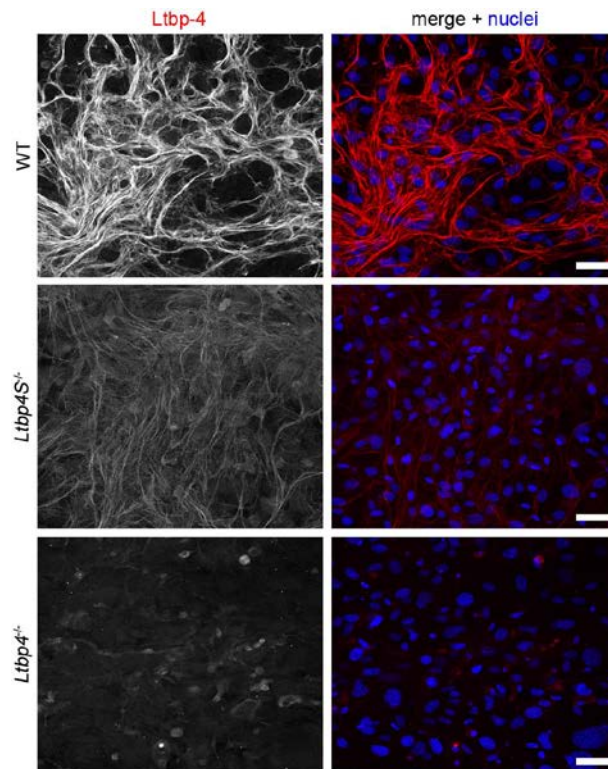

49

50

51 **Supplementary material Fig. S2. Expression of Ltbp-4 is reduced in *Ltbp4S*<sup>-/-</sup> and absent**  
52 **in *Ltbp4*<sup>-/-</sup> primary lung fibroblasts.**

53 Representative immunofluorescence staining of Ltbp-4 revealed reduced expression in primary lung fibroblasts  
54 from *Ltbp4S*<sup>-/-</sup> and no expression in primary lung fibroblasts from *Ltbp4*<sup>-/-</sup> mice compared to WT mice (Scale  
55 bar= 50 μm).

56

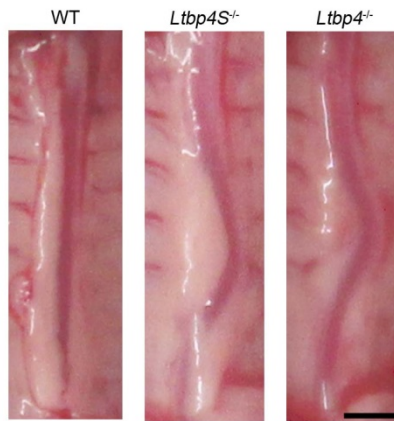

57

58

59 **Supplementary material Fig. S3. Ltbp-4 deficient mice have tortuous aortae.**

60 *Ltbp4S<sup>-/-</sup>* and *Ltbp4<sup>-/-</sup>* mice showed tortuous aortae compared to WT mice (Scale bar= 10 mm).

61

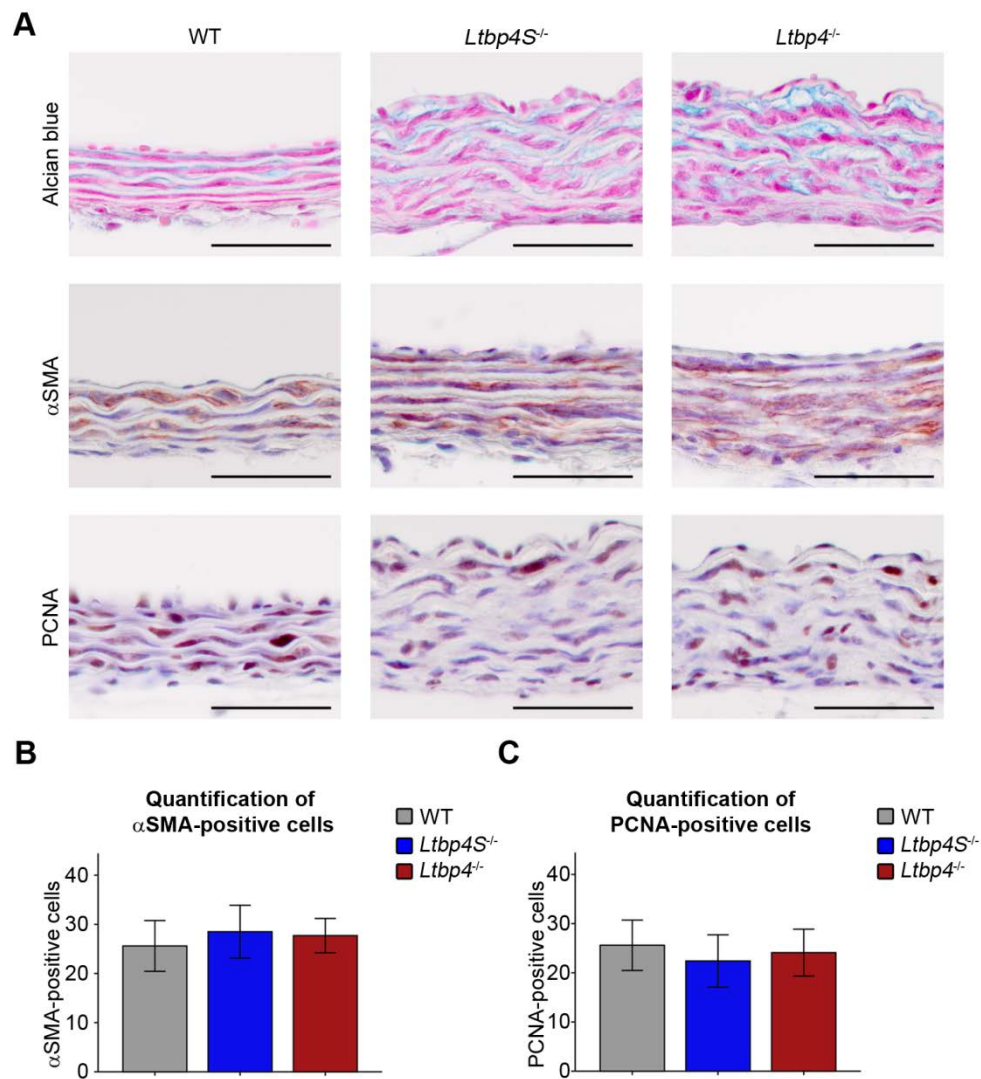

62

63 **Supplementary material Fig. S4. Analysis of aortic walls in *Ltbp-4* deficient mice.**

64 (A) Aortic walls of *Ltbp4S*<sup>-/-</sup> and *Ltbp4*<sup>-/-</sup> mice showed comparable signals for glycosaminoglycans (Alcian blue),

65  $\alpha$ SMA (marker for smooth muscle cells), or PCNA (marker for cellular proliferation). (B,C) There was no

66 difference between WT, *Ltbp4S*<sup>-/-</sup> and *Ltbp4*<sup>-/-</sup> aortic walls regarding the number of (B)  $\alpha$ SMA-positive, or (C)

67 PCNA-positive cells. (Scale bar= 50  $\mu$ m; n= 10; not significant).

68

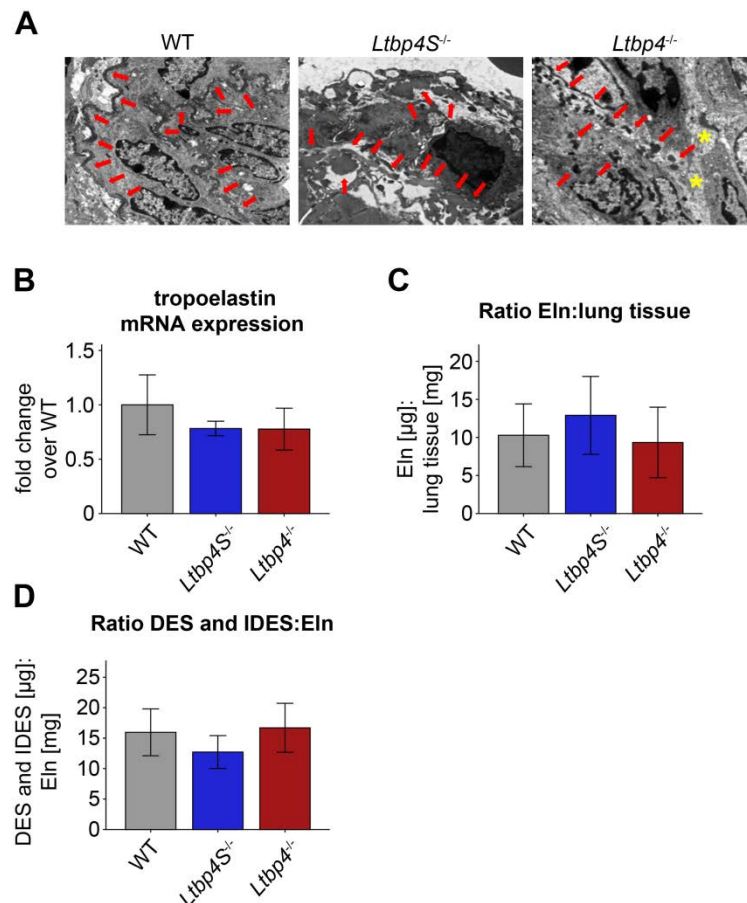

69

70 **Supplementary material Fig. S5. Electron microscopy in *Ltbp-4* deficient mice reveals**  
 71 **that integrity of elastic lamellae correlates with *Ltbp-4* presence, while the elastin**  
 72 **content and cross-linking is not affected.**

73 (A) Ultrastructural images of lungs from *Ltbp4<sup>-/-</sup>* mice revealed patches of condensed, amorphous elastin,  
 74 scattered irregularly, lacking organized, intact elastic fibers. In *Ltbp4S<sup>-/-</sup>* mice short fragments of plump,  
 75 amorphous elastic fiber fragments and well organized elastic fibers were evident. Red arrows point to deposited  
 76 elastic material and yellow asterisks (\*) to amorphous material between elastic fibers. (B) mRNA expression of  
 77 tropoelastin showed no differences in lungs from *Ltbp4S<sup>-/-</sup>* and *Ltbp4<sup>-/-</sup>* mice compared to WT mice. Tropoelastin  
 78 mRNA expression of WT mice was set to 1 ( $n \geq 3$ ; not significant). (C) Comparable amounts of elastin (Eln)  
 79 were presented in lung tissue from *Ltbp4S<sup>-/-</sup>* and *Ltbp4<sup>-/-</sup>* mice compared to WT mice ( $n \geq 5$ ; not significant).  
 80 (D) Ratios of desmosine and isodesmosine (DES and IDES) per mg Eln were similar in lungs from *Ltbp4S<sup>-/-</sup>* and  
 81 *Ltbp4<sup>-/-</sup>* mice compared to WT mice ( $n \geq 5$ ; not significant).

82

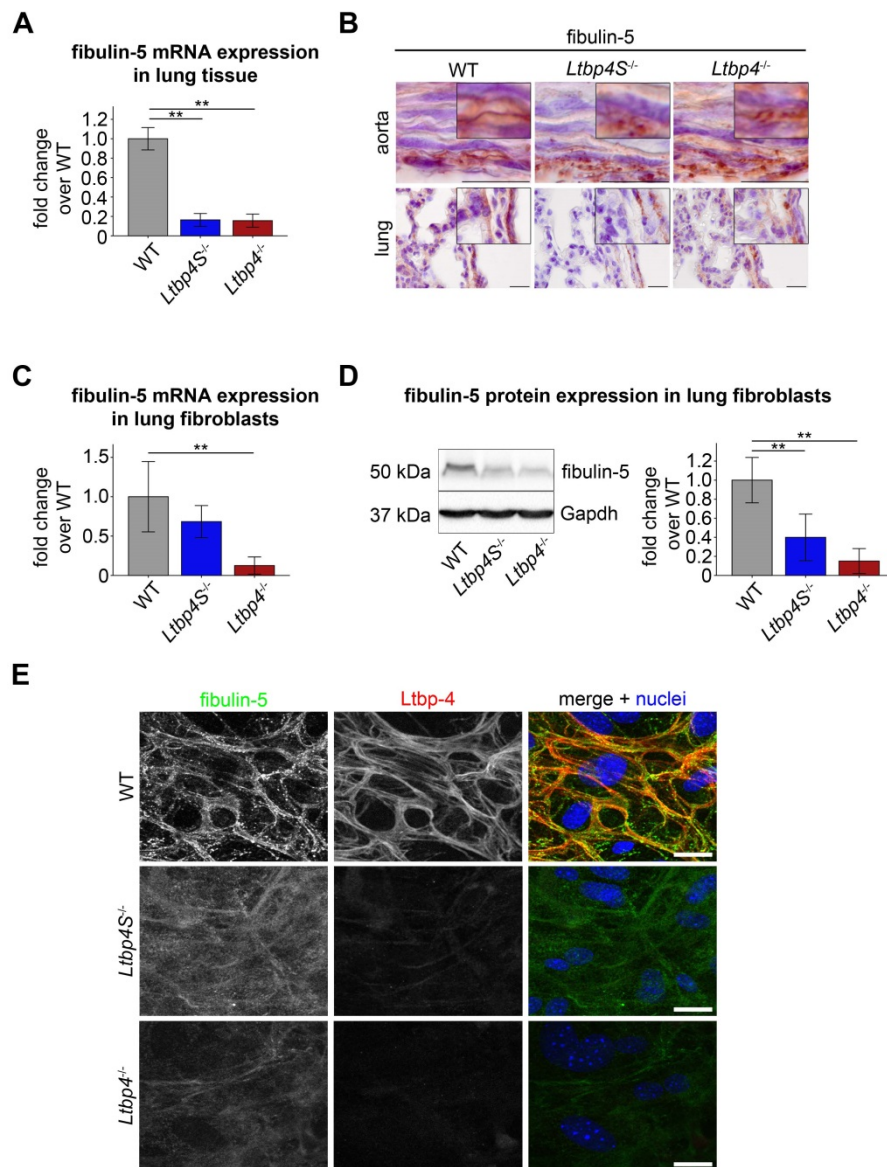

83

84 **Supplementary material Fig. S6. *Ltbp-4S* is necessary for ECM deposition of fibulin-5.**

85 (A) Fibulin-5 mRNA expression was significantly downregulated in lungs from *Ltbp4S*<sup>-/-</sup> and *Ltbp4*<sup>-/-</sup> mice  
 86 compared to WT mice (n= 4; \*\*p<0.01). (B) Representative images showed disruption of the fibrillar structure  
 87 of fibulin-5 fibers in aortic walls (upper panel; scale bars= 20 μm) and lungs (lower panel; scale bars= 50 μm)  
 88 from *Ltbp4S*<sup>-/-</sup> and *Ltbp4*<sup>-/-</sup> mice compared to WT mice. (C) Fibulin-5 mRNA expression displayed significant  
 89 downregulation in lung fibroblasts isolated from *Ltbp4*<sup>-/-</sup> mice compared to *Ltbp4S*<sup>-/-</sup> and WT mice (n≥ 5;  
 90 \*\*p<0.01). (D) Representative immunoblot of lung fibroblasts (left) and its densitometric analysis (right)  
 91 revealed significant downregulation of fibulin-5 in *Ltbp4S*<sup>-/-</sup> and *Ltbp4*<sup>-/-</sup> mice compared to WT mice  
 92 (n≥ 4; \*\*p<0.01). (E) Representative immunofluorescence staining of *Ltbp-4* and fibulin-5 of primary lung  
 93 fibroblasts revealed reduced *Ltbp-4* immunoreactivity in *Ltbp4S*<sup>-/-</sup> and absence of *Ltbp-4* in *Ltbp4*<sup>-/-</sup> mice. The  
 94 ECM deposition of fibulin-5 was impaired in *Ltbp4S*<sup>-/-</sup> and *Ltbp4*<sup>-/-</sup> mice compared to WT mice. Scale  
 95 bars= 100 μm. Protein as well as mRNA expression of fibulin-5 of the WT was set to 1.

96

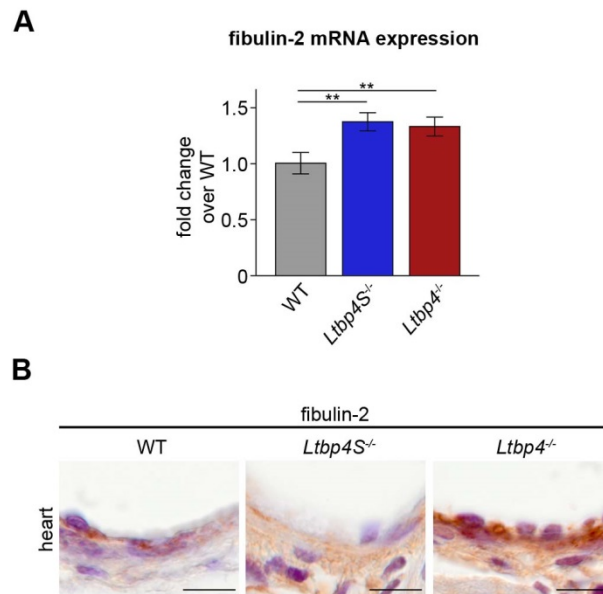

98

99 **Supplementary material Fig. S7. Fibulin-2 is upregulated in heart of *Ltbp-4* deficient**  
 100 **mice.**

101 (A) mRNA expression of fibulin-2 showed significant increase in hearts from *Ltbp4S<sup>-/-</sup>* and *Ltbp4<sup>-/-</sup>* mice  
 102 compared to WT mice. Fibulin-2 mRNA expression of WT mice was set to 1 ( $n \geq 5$ ;  $**p < 0.01$ ).  
 103 (B) Representative images showed an increase of fibulin-2 immunoreactivity especially in the vicinity of the  
 104 endothelial lining of the vessel walls in hearts of *Ltbp4S<sup>-/-</sup>* and *Ltbp4<sup>-/-</sup>* mice compared to WT  
 105 (Scale bar= 20  $\mu\text{m}$ ).

106



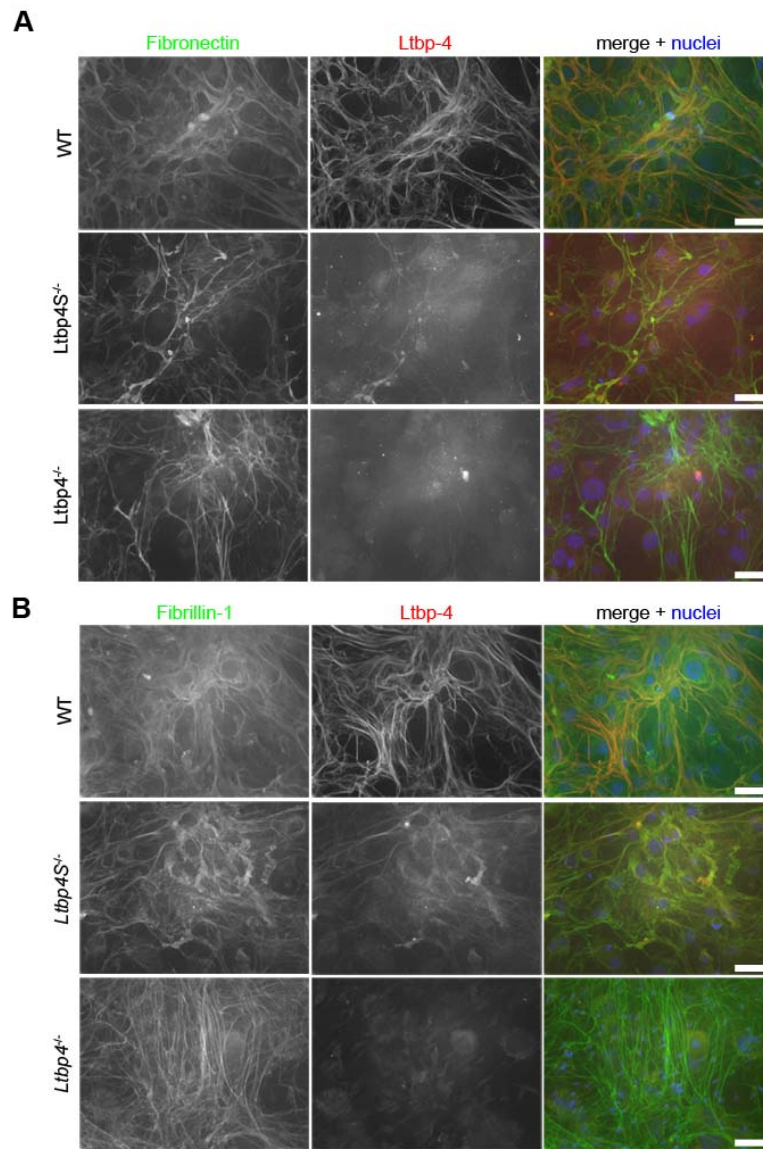

107

108 **Supplementary material Fig. S8. Fibronectin and fibrillin-1 network assembly is normal**  
 109 **in *Ltbp4S<sup>-/-</sup>* and *Ltbp4<sup>-/-</sup>* mice.**

110 Immunofluorescence images of assembled fibronectin and fibrillin-1 networks by primary lung fibroblasts  
 111 showed no differences between *Ltbp4S<sup>-/-</sup>* and *Ltbp4<sup>-/-</sup>* mice compared to WT mice. (Scale bar= 50  $\mu$ m).

112

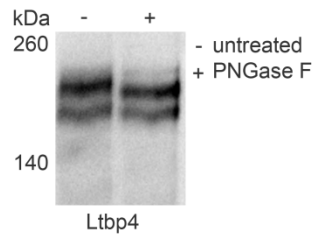

113

114 **Supplementary material Fig. S9. Deglycosylation of Ltp4 isolated from WT lungs.**

115 Deglycosylation digests with PNGase F of WT lungs showed a shift towards lower molecular  
116 weight positions.

117

118

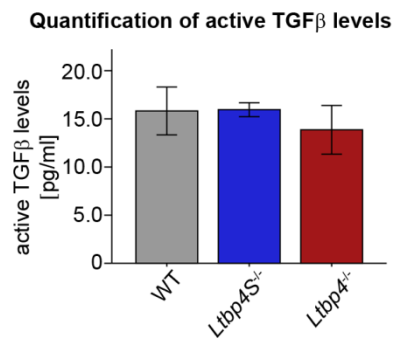

119

120 **Supplementary material Fig. S10. Active TGF $\beta$  levels are comparable in *Ltbp4<sup>S-/-</sup>*,**  
121 ***Ltbp4<sup>-/-</sup>* and WT mice.**

122 Conditioned media from isolated lung fibroblasts were collected and assayed for active TGF $\beta$  levels. No  
123 differences between *Ltbp4<sup>S-/-</sup>* and *Ltbp4<sup>-/-</sup>* mice compared to WT mice were detected (n= 3; p= n.s.).

124

125 **Supplementary material Table S1. Left-ventricular function is normal in *Ltbp4*<sup>-/-</sup> mice.**

|                                          | EF [%]         | LVEDV [ $\mu$ l] | LVESV [ $\mu$ l] | SV [ $\mu$ l] |
|------------------------------------------|----------------|------------------|------------------|---------------|
| <b>WT (n= 12)</b>                        | 72.2 $\pm$ 9.5 | 12.8 $\pm$ 1.9   | 3.5 $\pm$ 1.3    | 9.3 $\pm$ 1.9 |
| <b><i>Ltbp4</i><sup>-/-</sup> (n= 8)</b> | 76.1 $\pm$ 1.1 | 11.5 $\pm$ 0.2   | 2.8 $\pm$ 0.1    | 8.8 $\pm$ 0.3 |

126 The left ventricular end-diastolic volume (LVEDV), the left ventricular end-systolic volume (LVESV) and the  
 127 stroke volume (SV) tended to be lower and the ejection fraction (EF) tended to be higher but did not reach  
 128 statistical significance in *Ltbp4*<sup>-/-</sup> mice compared to WT mice as measured by transthoracic echocardiography  
 129 (p= n.s.).

130

131 **Supplementary material Table S2. Binding affinities for Ltpb-4L-2xStrep and**  
132 **Ltpb-4S-2xStrep interactions with rfibulin-4 and rfibulin-5.**

| analyte / ligand             | $k_{on} * 10^{-3}$ [nM <sup>-1</sup> s <sup>-1</sup> ] | $k_{off} * 10^{-3}$ [s <sup>-1</sup> ] | $K_d$ [nM] |
|------------------------------|--------------------------------------------------------|----------------------------------------|------------|
| Ltpb-4L-2xStrep / rfibulin-5 | 2.2                                                    | 5.3                                    | 2.4        |
| Ltpb-4S-2xStrep / rfibulin-5 | 1.0                                                    | 15.8                                   | 15.8       |
| Ltpb-4L-2xStrep / rfibulin-4 | 1.3                                                    | 4.1                                    | 3.1        |
| Ltpb-4S-2xStrep / rfibulin-4 | 0.7                                                    | 10.8                                   | 15.4       |

133 Surface plasmon resonance data measuring the binding affinity for immobilized recombinant full-length  
134 fibulin-4 and fibulin-5 (rfibulin; as ligand) and N-terminal Ltpb-4L (Ltpb-4L-2xStrep) and Ltpb-4S  
135 (Ltpb-4S-2xStrep) fragments flown over in solution (as analyte).

136

137 **Supplementary material Table S3. Primers and probes.**

|                                                         |                                                                                                                          |
|---------------------------------------------------------|--------------------------------------------------------------------------------------------------------------------------|
| 5mL4_gen                                                | 5'-CTCTGGGTGTCGCTATTGGT-3'                                                                                               |
| 3mL4_gen                                                | 5'-CAAGTCCATCCCCACACTCT-3'                                                                                               |
| betageo_gen                                             | 5'-GAAAGACCGCGAAGAGTTTG-3'                                                                                               |
| 3C7WT                                                   | 5'-GGCTCATGCTTGAATGTTTCAG-3'                                                                                             |
| 3C7P3                                                   | 5'-CCAATCTTGCTTCTTTGCTGAGC-3'                                                                                            |
| 3C7TG                                                   | 5'-ATCATGCAAGCTGGTGGCTG-3'                                                                                               |
| Ltp4_SV<br>(Primerdesign, Rownhams,<br>Southampton, UK) | Forward 5'-GGGACCCGGCTTCCGC-3'<br>Reverse 5'-GCAGCGATCAGGCTTCACA-3'<br>Probe 5'-CCTTCCTATGTCCCTTGATCTGTCAACGtgaagg-3'    |
| Ltp4_LV<br>(Primerdesign, Rownhams,<br>Southampton, UK) | Forward 5'-GTTGCTGCCTGTCAGTGC-3'<br>Reverse 5'-GCACCCCTCTAGACCTGTG-3'<br>Probe 5'-CCTAGACCAGACACCTAAGAGTAGCCGCgtctagg-3' |
| Tropoelastin                                            | Forward 5'-TTGCTGATCCTCTTGCTCAAC-3'<br>Reverse 5'-GCCCCTGGATAATAGACTCCAC-3'                                              |
| Fibulin-2                                               | Forward 5'-TGGTACCTGCACATATCTTCCGCA-3'<br>Reverse 5'- ACCACACCAGTGTAGGCATTGAGT-3'                                        |
| Fibulin-4                                               | Forward 5'-TGGTGCCTACAATGCCTTTC-3'<br>Reverse 5'-GGCGCTGACATTGTTGATTT-3'                                                 |
| Fibulin-5                                               | Forward 5'-CCGATACCCTGGTGCCTATT-3'<br>Reverse 5'-GCACTGATAGGCCCTGTTTG-3'                                                 |
| Gapdh                                                   | Forward 5'-ATGTGTCCGTCGTGGATCTGA-3'<br>Reverse 5'-TGCCTGCTTCACCACCTTCT-3'                                                |

138

139

140 **Supplementary material Table S4. Primary antibodies.**

|                                           |                                                      | Immuno-<br>blot | Immuno-histochemistry | Immuno-<br>fluorescence<br>analysis |
|-------------------------------------------|------------------------------------------------------|-----------------|-----------------------|-------------------------------------|
| $\alpha$ SMA                              | spring bioscience, USA                               |                 | 1:100                 |                                     |
| Ltp-4                                     | AF2885; R&D Systems, Germany                         | 1:1000          | 1:100                 | 1:2000                              |
| Fibulin-2                                 | ab125256; abcam, UK                                  |                 | 1:150                 |                                     |
| Fibulin-4                                 | kind gift from Takako Sasaki, Oita University, Japan | 1:2000          | 1:400                 | 1:2000                              |
| Fibulin-5                                 | #3775; Epitomics, USA                                | 1:5000          | 1:500                 | 1:5000                              |
| PCNA                                      | ab2426; abcam, UK                                    |                 | 1:6000                |                                     |
| Strep-tag <sup>®</sup><br>fusion proteins | 2-1507-001; IBA; Germany                             |                 |                       | 1:2000                              |

141  
142

143 **References**

144  
145  
146  
147  
148  
149  
150

**Sterner-Kock, A., Thorey, I. S., Koli, K., Wempe, F., Otte, J., Bangsow, T., Kuhlmeier, K., Kirchner, T., Jin, S., Keski-Oja, J. et al. (2002).** Disruption of the gene encoding the latent transforming growth factor-beta binding protein 4 (LTBP-4) causes abnormal lung development, cardiomyopathy, and colorectal cancer. *Genes & Development* **16**, 2264-73.
